# Supplementary material for: Comparison of Gut Bacterial Communities of Fall Armyworm (Spodoptera frugiperda) Reared on Different Host Plants
Source: MDPI journal article supplement (doi:10.3390/ijms222011266), 2021-10-19
Supplement: s1 [file s1]

**Table S1. Summary of sequence and OTUs data for the Illumina MiSeq operation of the experimental samples**

| Sample ID | Clean tags | Valid tags | Valid percent | Valid min length | Valid mean length | Valid max length | OTU counts | Total OTUs |
|-----------|------------|------------|---------------|------------------|-------------------|------------------|------------|------------|
| AD1       | 46923      | 42209      | 89.95%        | 229              | 408.99            | 443              | 657        | 6452       |
| AD2       | 68920      | 61503      | 89.24%        | 250              | 415.9             | 457              | 851        | 6452       |
| AD3       | 33892      | 30933      | 91.27%        | 252              | 411.09            | 443              | 670        | 6452       |
| CA1       | 69308      | 60618      | 87.46%        | 258              | 415.63            | 458              | 1112       | 6452       |
| CA2       | 53604      | 48134      | 89.80%        | 237              | 414.95            | 443              | 769        | 6452       |
| CA3       | 66751      | 60503      | 90.64%        | 229              | 412.54            | 449              | 951        | 6452       |
| CB1       | 67171      | 62421      | 92.93%        | 256              | 418.75            | 443              | 776        | 6452       |
| CB2       | 68492      | 59072      | 86.25%        | 256              | 417.17            | 443              | 1281       | 6452       |
| CB3       | 69848      | 63926      | 91.52%        | 255              | 417.89            | 443              | 688        | 6452       |
| WO1       | 68619      | 64456      | 93.93%        | 233              | 421.51            | 442              | 822        | 6452       |
| WO2       | 69829      | 65979      | 94.49%        | 255              | 423.16            | 443              | 767        | 6452       |
| WO3       | 69080      | 64587      | 93.50%        | 256              | 422.23            | 443              | 702        | 6452       |
| OR1       | 49247      | 44661      | 90.69%        | 236              | 415.67            | 442              | 836        | 6452       |
| OR2       | 69107      | 63280      | 91.57%        | 236              | 417.2             | 443              | 1289       | 6452       |
| OR3       | 71996      | 60821      | 84.48%        | 223              | 374.72            | 441              | 2235       | 6452       |
| PP1       | 70113      | 66957      | 95.50%        | 252              | 423.08            | 448              | 662        | 6452       |
| PP2       | 70957      | 67211      | 94.72%        | 256              | 421.84            | 455              | 669        | 6452       |
| PP3       | 68222      | 63903      | 93.67%        | 258              | 421.24            | 451              | 642        | 6452       |
