# Supplementary material for: Comparison of Gut Bacterial Communities of Fall Armyworm (Spodoptera frugiperda) Reared on Different Host Plants
Source: MDPI journal article supplement (doi:10.3390/ijms222011266), 2021-10-19
Supplement: s1 [file s1]

**Table S2. Alpha diversity index and number of species observed**

| Samples | Chao1   | Shannon | Simpson | PD_whole_tree | Good's_coverage | Observed_species |
|---------|---------|---------|---------|---------------|-----------------|------------------|
| AD1     | 1028.51 | 7.6702  | 0.9911  | 30.3134       | 0.9928          | 576.60           |
| AD2     | 1123.51 | 8.0691  | 0.9926  | 34.7304       | 0.9933          | 684.00           |
| AD3     | 1029.97 | 7.7522  | 0.9918  | 32.0139       | 0.9923          | 664.20           |
| CA1     | 1294.20 | 7.6731  | 0.9581  | 47.0583       | 0.9938          | 962.30           |
| CA2     | 1162.03 | 7.3596  | 0.9810  | 31.5851       | 0.9915          | 646.20           |
| CA3     | 1211.50 | 7.8387  | 0.9759  | 38.1084       | 0.9935          | 792.30           |
| CB1     | 970.64  | 5.5406  | 0.8143  | 30.6252       | 0.9936          | 601.20           |
| CB2     | 1458.89 | 6.2261  | 0.8415  | 49.5659       | 0.9917          | 1096.80          |
| CB3     | 884.12  | 6.5019  | 0.9151  | 29.0913       | 0.9944          | 530.40           |
| WO1     | 996.46  | 4.5854  | 0.7418  | 33.4088       | 0.9936          | 637.20           |
| WO2     | 935.23  | 2.7332  | 0.4260  | 29.6986       | 0.9934          | 567.10           |
| WO3     | 848.52  | 2.5908  | 0.3977  | 29.2599       | 0.9944          | 559.20           |
| OR1     | 1140.24 | 7.7299  | 0.9783  | 36.4895       | 0.9924          | 740.70           |
| OR2     | 1397.63 | 7.0110  | 0.9521  | 45.9229       | 0.9923          | 1099.30          |
| OR3     | 2359.13 | 7.6192  | 0.9809  | 64.4062       | 0.9800          | 1841.00          |
| PP1     | 902.05  | 3.5125  | 0.6839  | 28.0981       | 0.9945          | 495.20           |
| PP2     | 847.84  | 3.5383  | 0.6002  | 28.3418       | 0.9944          | 507.00           |
| PP3     | 824.65  | 3.8014  | 0.6272  | 25.2728       | 0.9945          | 485.80           |
