# Supplementary material for: Comparison of Gut Bacterial Communities of Fall Armyworm (Spodoptera frugiperda) Reared on Different Host Plants
Source: MDPI journal article supplement (doi:10.3390/ijms222011266), 2021-10-19
Supplement: s1 [file s1]

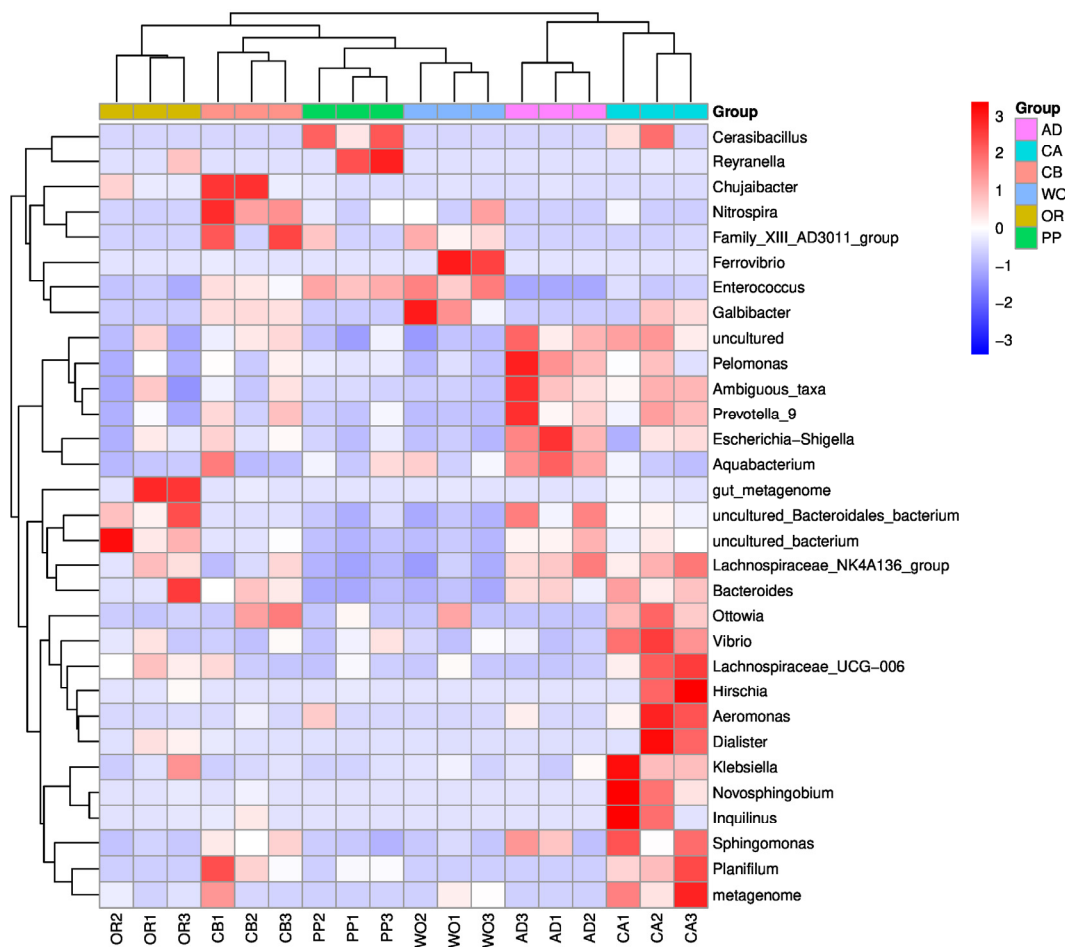

**Figure S2. Heatmap of dominant bacteria in different samples at the level of genus classification.** Transverse is sample information. Longitudinal is species annotation information. The cluster tree on the left of the figure is a species cluster tree. The cluster branch group on top represents samples from different hosts. Red indicates relatively high species abundance, and blue indicates relatively low species abundance.
