# Supplementary figures and images for: Comparison of Gut Bacterial Communities of Fall Armyworm (Spodoptera frugiperda) Reared on Different Host Plants
Source: MDPI journal article supplement (doi:10.3390/ijms222011266), 2021-10-19

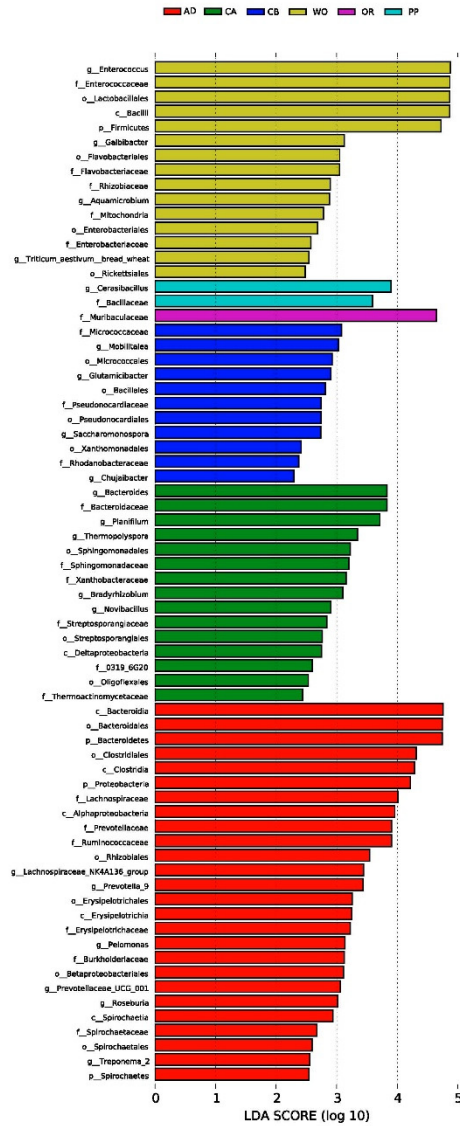

**Figure S3. Bacterial taxa with linear discriminant analysis (LDA) score of each host**

Supplement: s1 [file s1]

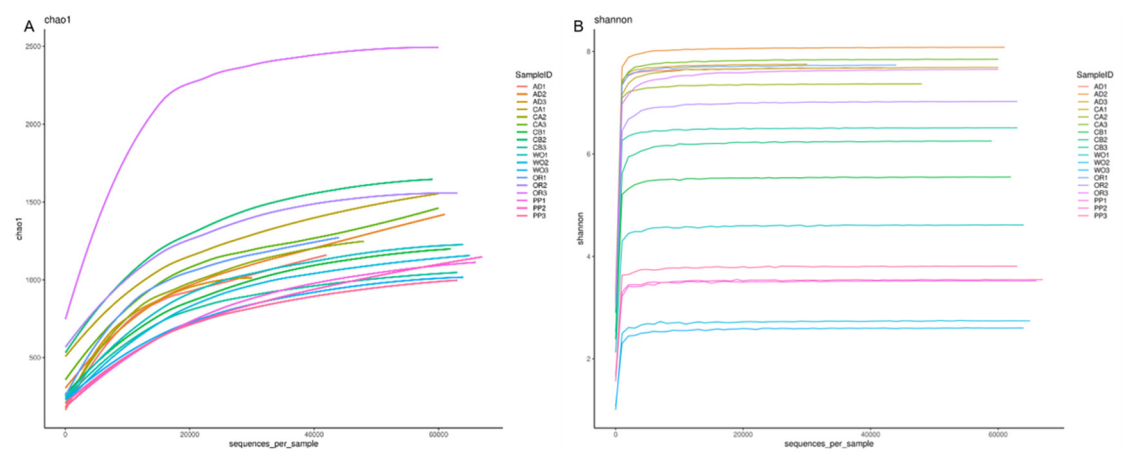

**Figure S1. Alpha diversity index rarefaction curves. (A) Chao1 index (B) Shannon index**

Supplement: s1 [file s1]
